# Supplementary material for: CircRNA circ_0072995 promotes the progression of epithelial ovarian cancer by modulating miR-147a/CDK6 axis
Source: Aging (Albany NY). 2020 Sep 2;12(17):17209–23. doi: 10.18632/aging.103668 (PMC7521494; doi:10.18632/aging.103668)
Supplement: Supplementary File 1 [file aging-12-103668-s001..xlsx]

## Sheet: aging-12-103668-s001
Supplementary File 1. StarBase-hsa-circ-0072995.
#please cite:
#Zhou KR, Liu S, Cai L, Bin L, et al. ENCORI: The Encyclopedia of RNA Interactomes.
#2.Li JH, et al.starBase v2.0: decoding miRNA-ceRNA, miRNA-ncRNA and protein-RNA interaction networks from large-scale CLIP-Seq data , Nucleic Acids Res. 2014 Jan;42:D92-7.
miRNAid	miRNAname	geneID	geneName	geneType	chromosome	start	end	strand	clipExpNum	degraExpNum	RBP	merClass	miRseq	align	targetSeq
MIMAT0027392	hsa-miR-6746-5p	NM_001080479	RGNEF	circRNA	chr5	73069741	73069763	+	1	0	AGO2	7mer-m8	ggUCCGGUGGAGGA-AGAGGGCc	|| :| :||: | |||||||	ccAGUUCUUCUUGUGUCUCCCGg
MIMAT0000732	hsa-miR-378a-3p	NM_001080479	RGNEF	circRNA	chr5	73069748	73069775	+	1	0	AGO2	7mer-m8	cgGAAGACUGAGG------UUCAGGUCa	||| || |||| :|||||||	uuCUUGUGUCUCCCGGGGGGAGUCCAGg
MIMAT0019074	hsa-miR-378i	NM_001080479	RGNEF	circRNA	chr5	73069749	73069775	+	1	0	AGO2	7mer-m8	ggAAGACUGAGG------AUCAGGUCa	|| || |||| |||||||	ucUUGUGUCUCCCGGGGGGAGUCCAGg
MIMAT0014999	hsa-miR-378b	NM_001080479	RGNEF	circRNA	chr5	73069751	73069775	+	1	0	AGO2	7mer-m8	aagACGGAGG------UUCAGGUCa	||:|||| :|||||||	uugUGUCUCCCGGGGGGAGUCCAGg
MIMAT0018119	hsa-miR-3690	NM_001080479	RGNEF	circRNA	chr5	73069751	73069776	+	1	0	AGO2	7mer-m8	gaaACAGAUG--CGACC-CAGGUCCa	||||| | | || |||||||	uugUGUCUCCCGGGGGGAGUCCAGGc
MIMAT0001339	hsa-miR-422a	NM_001080479	RGNEF	circRNA	chr5	73069754	73069775	+	1	0	AGO2	7mer-m8	cggaagacugggaUUCAGGUCa	:|||||||	ugucucccgggggGAGUCCAGg
MIMAT0018984	hsa-miR-378h	NM_001080479	RGNEF	circRNA	chr5	73069755	73069775	+	1	0	AGO2	7mer-m8	gguagacuguggUUCAGGUCa	:|||||||	gucucccgggggGAGUCCAGg
MIMAT0018926	hsa-miR-378d	NM_001080479	RGNEF	circRNA	chr5	73069756	73069775	+	1	0	AGO2	7mer-m8	aaagacugaggUUCAGGUCa	:|||||||	ucucccgggggGAGUCCAGg
MIMAT0018932	hsa-miR-378f	NM_001080479	RGNEF	circRNA	chr5	73069756	73069775	+	1	0	AGO2	7mer-m8	gaagaccgaggUUCAGGUCa	:|||||||	ucucccgggggGAGUCCAGg
MIMAT0018927	hsa-miR-378e	NM_001080479	RGNEF	circRNA	chr5	73069757	73069775	+	1	0	AGO2	7mer-m8	aggacugaggUUCAGGUCa	:|||||||	cucccgggggGAGUCCAGg
MIMAT0000442	hsa-miR-9-3p	NM_001080479	RGNEF	circRNA	chr5	73069805	73069826	+	1	0	AGO1-4	7mer-m8	ugaaagccaaUAGAUCGAAAUa	| :||||||||	acaccauuagACUUAGCUUUAc
MIMAT0000421	hsa-miR-122-5p	NM_001080479	RGNEF	circRNA	chr5	73069820	73069841	+	1	0	AGO1-4	8mer	guuugugguaacagUGUGAGGu	|||||||	gcuuuacgugaaggACACUCCa
MIMAT0002814	hsa-miR-432-5p	NM_001080479	RGNEF	circRNA	chr5	73069823	73069844	+	1	0	AGO1-4	7mer-m8	ggUGGGUUACUGGAUGAGGUUCu	|| ::| |: | ||||||||	uuACGUGAAGGAC-ACUCCAAGc
MIMAT0003879	hsa-miR-758-3p	NM_001080479	RGNEF	circRNA	chr5	73069842	73069863	+	1	0	AGO1-4	8mer	ccaAUCACCUGGUCCAGUGUUu	|:||||| | |||||||	agcUGGUGGAAGACGUCACAAa
MIMAT0000735	hsa-miR-380-3p	NM_001080479	RGNEF	circRNA	chr5	73072389	73072410	+	1	0	AGO1-4	7mer-m8	uucuacaccugguaUAAUGUAu	|||||||	agaagccuccuugcAUUACAUu
MIMAT0000251	hsa-miR-147a	NM_001080479	RGNEF	circRNA	chr5	73072431	73072450	+	2	0	AGO1-4	7mer-m8	cgucuucguaaaGGUGUGUg	|||||||	ccugacccugaaCCACACAg
MIMAT0000102	hsa-miR-105-5p	NM_001080479	RGNEF	circRNA	chr5	73072442	73072462	+	2	0	AGO1-4	7mer-m8	ugGUGUCCUCAGACUCGUAAACu	|||| || | |||||||||	acCACA-CAG-CCGAGCAUUUGu
MIMAT0030428	hsa-miR-7853-5p	NM_001080479	RGNEF	circRNA	chr5	73072442	73072462	+	2	0	AGO1-4	7mer-m8	cuucaguccuagaCGUAAACu	|||||||	accacacagccgaGCAUUUGu
MIMAT0004921	hsa-miR-889-3p	NM_001080479	RGNEF	circRNA	chr5	73072459	73072478	+	2	0	AGO1-4	8mer	uguuACCAACAGGCUAUAAUu	||| | | |||||||	uuguUGG-AGGCAGAUAUUAa
MIMAT0019909	hsa-miR-4761-3p	NM_001080479	RGNEF	circRNA	chr5	73076525	73076547	+	1	0	AGO1-4	7mer-m8	ccugUUUCACG-CG-UACGGGAg	|||| | || |||||||	gaggAAAGAACAGCUAUGCCCUc
