# Supplementary material for: CircRNA circ_0072995 promotes the progression of epithelial ovarian cancer by modulating miR-147a/CDK6 axis
Source: Aging (Albany NY). 2020 Sep 2;12(17):17209–23. doi: 10.18632/aging.103668 (PMC7521494; doi:10.18632/aging.103668)
Supplement: Supplementary File 2 [file aging-12-103668-s002..xlsx]

## Sheet: Sheet1
Supplementary File 2. 141 genes.
BMP4
IGF2
PCP4
SSX3
SMIM12
SSX2
SSX2B
VSNL1
EDN1
TPT1
IKBIP
CYP2S1
CALM1
KLF7
SH3TC2
SSR1
GPD1L
SLC13A5
SLC25A4
SLC43A3
HDLBP
SLC35F5
RGS17
ABHD14B
TMEM185B
PLCXD3
C1GALT1C1
TTI1
INHBA
TECPR2
PSMA4
ACLY
RAB27B
BCL7B
SYT9
UNC13A
MDM2
LATS2
CREBRF
MAPK10
AHCYL1
ACAD9
PPP1R2
SLC44A1
PDPK1
TAB3
BRCA2
TP53RK
PTPRK
PABPC4L
SLC16A1
ZEB2
AKT2
RPS6KB1
PBLD
UFL1
FOXN2
HSPA8
CKAP2
SENP1
ZNF689
IGF2BP2
ATP11A
RIC8A
ABCC4
PARG
BCOR
CHMP7
SEMA6A
NAA30
LEMD3
KIF20A
STX6
ATAD1
REEP3
SHOC2
IPO9
UBQLN2
ATP9A
DAB2
SACM1L
ZKSCAN1
ABHD2
PDP2
ADIPOR2
SGK1
ZNF746
LIMD1
RSPRY1
VGLL3
FBXO32
OXSR1
PPP2R2A
RFWD3
EPHA5
LONRF2
PLXDC2
ARHGAP1
NF1
RNF41
IL13RA1
STRN
ADAM12
KPNB1
KIF5A
SLC2A12
ROBO2
DIP2A
ZDHHC3
TNRC6B
PRUNE2
CDK6
SEC61A2
TANC2
P2RY2
ANKH
RORA
ARIH1
FDFT1
IL6ST
ZNF451
PLXNA2
DTNA
KIAA1549L
SEMA6D
ZNF704
NFAT5
NR3C1
GLUL
PUM2
ATRX
ZNF398
ATRN
AKT3
CACNB3
MECP2
CISD3
ZFX
CALU
FMNL3
MXRA7
